# Supplementary material for: Preparation of chiral ladder-like polysilsesquioxanes and their chiral induction to anionic dye compound
Source: Royal Society of Chemistry journal article supplement (doi:10.1039/c1jm13414k), 2011-01-01
Supplement: c1jm13414k.pdf [file c1jm13414k.pdf]

## Electronic Supplementary Information (ESI)

Preparation of chiral ladder-like polysilsesquioxanes and their chiral induction to anionic dye compound

Yoshiro Kaneko,\* Hisaya Toyodome and Hisako Sato

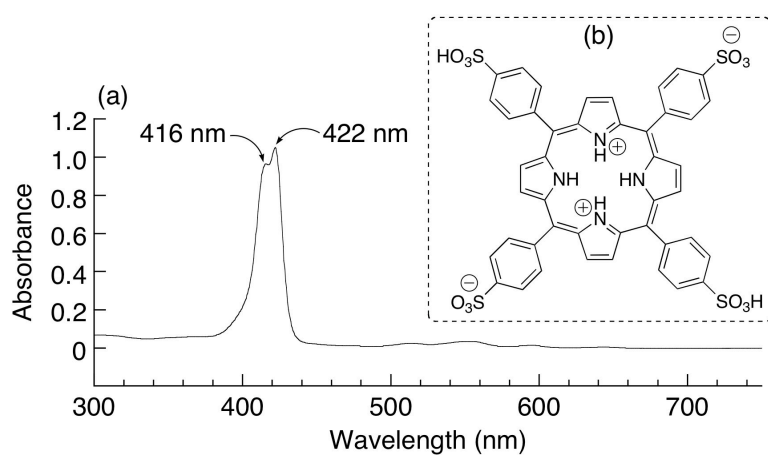

**Fig. S1** (a) UV-Vis spectrum of TPPS in methanol (concentration = 4  $\mu\text{mol/L}$ ) and (b) chemical structure of TPPS.
